# Supplementary material for: The magnetic coupling in manganese-based dinuclear superhalogens and their analogues. A theoretical characterization from a combined DFT and BS study
Source: Royal Society of Chemistry journal article supplement (doi:10.1039/c1cp22928a), 2011-12-07
Supplement: c1cp22928a.pdf [file c1cp22928a.pdf]

## The magnetic coupling in manganese-based dinuclear superhalogens and their analogues. A theoretical characterization from combined DFT and BS study

Bing Yin,<sup>\*ab</sup> Jianli Li,<sup>a</sup> Hongcun Bai,<sup>c</sup> Zhenyi Wen,<sup>ab</sup> Zhenyi Jiang<sup>b</sup> and Yuanhe Huang<sup>d</sup>

<sup>a</sup> MOE Key Laboratory of Synthetic and Natural Functional Molecule Chemistry, Shaanxi Key Laboratory of Physico-Inorganic Chemistry, College of Chemistry and Materials Science, Northwest University, Xi'an 710069, China. Fax: +86 29 88302331; Tel: +86 29 88303540; E-mail: rayinyin@gmail.com

<sup>b</sup> Institute of Modern Physics, Northwest University, Xi'an 710069, China.

<sup>c</sup> Key Laboratory of Energy Source and Chemical Engineering, State Key Laboratory Cultivation Base of Natural Gas Conversion, Ningxia University, Yinchuan, Ningxia 750021, China.

<sup>d</sup> College of Chemistry, Beijing Normal University, Beijing, 100875, China.

**Table S1 Lowest frequencies of normal modes of clusters under study (in cm<sup>-1</sup>)** 2

**Table S2 Relative energies of various HS and BS states of [Fe<sub>2</sub>Cl<sub>5</sub>]<sup>+</sup> (in K cal mol<sup>-1</sup>)** 3

**Table S3 Relative energies of various HS and BS states of MnFeCl<sub>5</sub> (in K cal mol<sup>-1</sup>)** 4

**Table S1 Lowest frequencies of normal modes of clusters under study (in  $\text{cm}^{-1}$ )<sup>a</sup>**

|                                                    |    | B3LYP       | O3LYP       | MPW1        | BLYP           | OLYP        | PW91         |
|----------------------------------------------------|----|-------------|-------------|-------------|----------------|-------------|--------------|
| DB-[Mn <sub>2</sub> Cl <sub>5</sub> ] <sup>-</sup> | DZ | 18.90/17.68 | 16.32/15.81 | 16.55/14.91 | 18.97/16.42    | 19.02/17.21 | 16.97/11.28  |
|                                                    | TZ | 15.13/13.67 | 13.91/12.83 | 12.45/10.06 | 15.22/10.84    | 15.94/13.17 | 11.95/-6.54  |
|                                                    | QZ | 15.76/14.32 | 15.48/14.79 | 13.30/11.13 | 16.18/12.58    | 17.30/14.67 | 13.77/5.56   |
| TB-[Mn <sub>2</sub> Cl <sub>5</sub> ] <sup>-</sup> | DZ | 50.28/51.40 | 51.88/52.29 | 50.17/51.04 | 47.67/50.10    | 51.44/52.49 | 46.21/48.70  |
|                                                    | TZ | 50.42/51.40 | 53.50/53.64 | 49.95/50.72 | 48.01/50.03    | 51.32/52.07 | 46.15/48.22  |
|                                                    | QZ | 50.46/51.75 | 52.30/52.88 | 50.64/51.68 | 47.95/50.10    | 51.44/52.49 | 46.21/48.70  |
| DB-[Fe <sub>2</sub> Cl <sub>5</sub> ] <sup>+</sup> | DZ | 19.06/18.14 | 22.67/22.12 | 20.09/20.15 | -15.33/-107.45 | 18.25/-5.15 | -4.70/-69.11 |
|                                                    | TZ | 19.52/19.19 | 27.77/21.34 | 19.27/19.64 | 13.90/13.97    | 18.27/11.75 | 15.68/-66.92 |
|                                                    | QZ | 18.97/18.48 | 22.24/21.63 | 19.40/19.60 | 8.92/14.24     | 18.70/9.67  | 14.83/-82.31 |
| TB-[Fe <sub>2</sub> Cl <sub>5</sub> ] <sup>+</sup> | DZ | 45.64/53.73 | 47.41/51.42 | 45.54/52.25 | 45.22/53.71    | 44.02/51.91 | 40.27/52.94  |
|                                                    | TZ | 45.26/53.27 | 46.81/51.14 | 44.32/52.18 | 41.98/53.75    | 42.84/51.64 | 39.69/53.01  |
|                                                    | QZ | 48.25/55.39 | 50.06/54.12 | 47.55/54.21 | 44.57/55.14    | 47.09/54.09 | 42.92/54.42  |
| DB-MnFeCl <sub>5</sub>                             | DZ | 17.70/19.73 | 16.42/17.14 | 17.73/18.75 | 15.06/21.29    | 15.49/19.53 | 15.63/20.15  |
|                                                    | TZ | 17.25/19.05 | 14.39/14.86 | 17.21/18.44 | 14.31/20.99    | 13.61/19.11 | 14.24/19.88  |
|                                                    | QZ | 16.47/18.38 | 15.33/15.77 | 16.96/18.04 | 13.36/21.52    | 14.13/19.98 | 14.96/21.89  |
| TB-MnFeCl <sub>5</sub>                             | DZ | 44.25/50.01 | 49.41/51.60 | 45.01/49.36 | 38.81/48.78    | 45.70/50.36 | 37.45/47.68  |
|                                                    | TZ | 44.42/49.86 | 47.36/51.66 | 44.73/49.31 | 37.93/48.53    | 44.80/49.92 | 36.29/47.48  |
|                                                    | QZ | 44.26/50.36 | 45.66/51.82 | 45.30/50.24 | 37.65/49.71    | 45.19/51.59 | 37.68/49.40  |

<sup>a</sup> results from calculations on optimized structures of HS states are at the left side of “/”, results from calculations on optimized structures of BS states are at the right side of “/”.

**Table S2 Relative energies of various HS and BS states of  $[\text{Fe}_2\text{Cl}_5]^+$  (in K cal mol<sup>-1</sup>)**

|    |                    | B3LYP | O3LYP | MPW1  | BLYP  | OLYP  | PW91  |
|----|--------------------|-------|-------|-------|-------|-------|-------|
| DZ | DB-HS <sup>a</sup> | 10.36 | 3.78  | 12.86 | 12.87 | 10.34 | 17.02 |
|    | DB-BS <sup>b</sup> | 9.00  | 3.13  | 11.62 | 9.05  | 8.18  | 12.40 |
|    | TB-HS <sup>c</sup> | 3.57  | 2.06  | 3.14  | 8.18  | 5.43  | 9.25  |
|    | TB-BS <sup>d</sup> | 0.00  | 0.00  | 0.00  | 0.00  | 0.00  | 0.00  |
| TZ | DB-HS              | 8.96  | 2.20  | 11.55 | 11.41 | 9.22  | 15.83 |
|    | DB-BS              | 7.58  | 1.53  | 10.24 | 7.51  | 6.99  | 11.19 |
|    | TB-HS              | 3.71  | 2.28  | 3.38  | 8.66  | 5.81  | 9.46  |
|    | TB-BS              | 0.00  | 0.00  | 0.00  | 0.00  | 0.00  | 0.00  |
| QZ | DB-HS              | 9.08  | 2.24  | 11.75 | 11.15 | 9.20  | 15.57 |
|    | DB-BS              | 7.72  | 1.54  | 10.49 | 7.28  | 7.02  | 11.10 |
|    | TB-HS              | 3.74  | 2.40  | 3.37  | 8.08  | 5.82  | 9.25  |
|    | TB-BS              | 0.00  | 0.00  | 0.00  | 0.00  | 0.00  | 0.00  |

<sup>a</sup> HS state of double-bridged structure. <sup>b</sup> BS state of double-bridged structure. <sup>c</sup> HS state of triple-bridged structure. <sup>d</sup> BS state of triple-bridged structure.

**Table S3 Relative energies of various HS and BS states of MnFeCl<sub>5</sub> (in K cal mol<sup>-1</sup>)**

|    |                    | B3LYP | O3LYP | MPW1 | BLYP | OLYP | PW91 |
|----|--------------------|-------|-------|------|------|------|------|
| DZ | DB-HS <sup>a</sup> | 2.70  | -0.62 | 3.86 | 7.08 | 4.70 | 9.92 |
|    | DB-BS <sup>b</sup> | 1.07  | -1.60 | 2.50 | 2.12 | 1.71 | 4.24 |
|    | TB-HS <sup>c</sup> | 3.78  | 2.51  | 3.32 | 8.64 | 5.89 | 9.44 |
|    | TB-BS <sup>d</sup> | 0.00  | 0.00  | 0.00 | 0.00 | 0.00 | 0.00 |
| TZ | DB-HS              | 1.69  | -1.58 | 2.92 | 5.83 | 3.76 | 8.89 |
|    | DB-BS              | 0.04  | -2.58 | 1.48 | 0.76 | 0.55 | 2.89 |
|    | TB-HS              | 3.73  | 2.48  | 3.38 | 8.35 | 6.01 | 9.42 |
|    | TB-BS              | 0.00  | 0.00  | 0.00 | 0.00 | 0.00 | 0.00 |
| QZ | DB-HS              | 1.50  | -1.96 | 2.78 | 5.46 | 3.51 | 8.53 |
|    | DB-BS              | -0.14 | -2.97 | 1.39 | 0.43 | 0.31 | 2.67 |
|    | TB-HS              | 3.78  | 2.60  | 3.43 | 8.34 | 6.15 | 9.40 |
|    | TB-BS              | 0.00  | 0.00  | 0.00 | 0.00 | 0.00 | 0.00 |

<sup>a</sup> HS state of double-bridged structure. <sup>b</sup> BS state of double-bridged structure. <sup>c</sup> HS state of triple-bridged structure. <sup>d</sup> BS state of triple-bridged structure.
